# Supplementary material
Source: Springer Nature journal article supplement (https://www.springermedizin.de/resource/supplementary/13031_2012_119_MOESM3_ESM.pdf/9645140)
Supplement: MOESM3 [file 9645140]

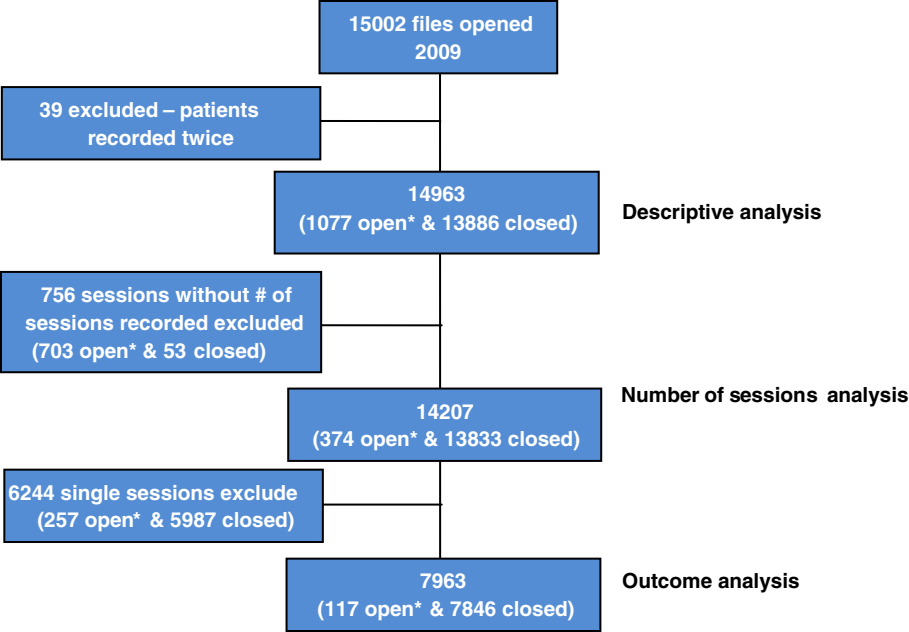

15002 files opened  
2009

39 excluded – patients  
recorded twice

14963  
(1077 open\* & 13886 closed)

**Descriptive analysis**

756 sessions without # of  
sessions recorded excluded  
(703 open\* & 53 closed)

14207  
(374 open\* & 13833 closed)

**Number of sessions analysis**

6244 single sessions exclude  
(257 open\* & 5987 closed)

7963  
(117 open\* & 7846 closed)

**Outcome analysis**
